22 **Running title:**

23 Genome sequences of a Québec archeological beer strain

24

25 **Keywords:**

26 yeast, polyploidy, long-read sequencing, beer brewing, archeology

27

28 **Corresponding authors :**

29 Anna Fijarczyk

30 1030, Avenue de la Médecine

31 Université Laval

32 Québec (Québec) G1V 0A6

33 Canada

34 Phone: 418 656-3933

35 [anna.fijarczyk.1@ulaval.ca](mailto:anna.fijarczyk.1@ulaval.ca)

36

37 Christian Landry

38 1030, Avenue de la Médecine

39 Université Laval

40 Québec (Québec) G1V 0A6

41 Canada

42 Phone: 418-656-3954

43 [christian.landry@bio.ulaval.ca](mailto:christian.landry@bio.ulaval.ca)

## 44 **Abstract**

45 The genome sequences of archeological yeast isolates can reveal insights about the  
46 history of human baking, brewing and winemaking activities and migration around the  
47 globe. A yeast strain called Jean-Talon was recently isolated from the vaults of the  
48 Intendant's Palace of Nouvelle France on a historical site in Québec City. This site has  
49 been occupied by various breweries, starting from the end of the 17th century and until  
50 the middle of the 20th century. We sequenced the genome of the Jean-Talon strain with  
51 short and long reads and reanalyzed the genomes of hundreds of yeast strains to  
52 identify its species of origin and determine how it relates to other domesticated and wild  
53 strains. The Jean-Talon strain is a tetraploid strain with numerous aneuploidies, is  
54 partially sterile and most closely related to beer strains from the beer and bakery  
55 genetic groups and industrial strains from the United Kingdom and Belgium. We  
56 conclude from this that the Jean-Talon strain most likely derives from recent brewing  
57 activities that took place in the same location and not from wild yeast that could have  
58 been domesticated by the original brewers of the Nouvelle France on the site.

59

## 60 Introduction

61 The budding yeast *Saccharomyces cerevisiae* has a long history of domestication by  
62 humans for the production of fermented food and beverages (Marsit *et al.* 2017). Among  
63 the oldest evidence of this domestication are traces of DNA from more than 3000 years  
64 old wine jars in Egypt (Cavaliere *et al.* 2003). Signs of beer and chemical traces of beer  
65 production dating back from the last half of the fourth millennium before Christ were  
66 identified in sumerian artifacts (Michel *et al.* 1992). Alcoholic beverages were also  
67 present in prehistoric China about 9000 years before present (McGovern *et al.* 2004).  
68 Human populations brought fermented produces with them during their migration,  
69 including wine (Marsit *et al.* 2017), coffee and cacao beans (Ludlow *et al.* 2016), and  
70 this human assisted migration has contributed to the genetic organization of today's  
71 population structure of *S. cerevisiae* (Peter *et al.* 2018). For instance, the genome  
72 analysis of some ale beer strains recently revealed that they originated from both  
73 European wine strains and Asian rice wine strains (Fay *et al.* 2019).

74

75 The production of fermented beverages by European settlers in North America started  
76 early in the colonies, for instance in the North American territory that became Nouvelle  
77 France and eventually French Canada. A common drink for French settlers in the 17th  
78 century called “bouillon” was made of bread leaven that was incubated in water,  
79 producing a lightly alcoholic beverage. Artisanal and domestic beer brewing most likely  
80 started during that period (Moussette 1992). Later in the 17th Century, the first industrial  
81 brewery was founded by the French King representative, the Intendant Jean Talon  
82 (Moussette 1996).

83

84 To establish his brewery, Talon acquired a relatively large lot, at the crossing of St.  
85 Charles and St. Lawrence rivers in Québec City, and built a massive 40 meters long  
86 building with modern brewing equipment (Moussette 1994). The brewery was short lived  
87 (1670-1675). However, after the British conquest (1763), entrepreneurs turned to  
88 brewing again. The lot for Talon's old brewery had been turned into a powder storage  
89 and the Intendant's Palace (1686-1713), which was destroyed by a fire and served as  
90 warehouses for the remainder of Nouvelle France.

91

92 In the early 19th century, the site went back to the brewing industry, thanks to the most  
93 successful family in Québec City's brewing business, the Boswells. Joseph Knight  
94 Boswell was an Irish migrant born in 1812 who had been trained in Scotland. He settled  
95 in Québec City in 1830 and quickly worked as brewmaster before opening his own  
96 business, Anchor Brewery, in the 1840's. Boswell expanded his business throughout  
97 the 1840's and finally linked his booming brewery with Talon's brewery in 1852 by  
98 renting the plot on which Talon's brewery was built in the 17<sup>th</sup> Century (Guimont 1987).  
99 The French vaults that Boswell rented were not from Talon's brewery, but from the  
100 Second's Intendant's Palace (1713-1725), built slightly north of the brewery's original  
101 site. Boswell will first use the 18<sup>th</sup> Century vaults to store beer. Then, in 1875, he had a  
102 large building built on top of the vaults for his malting equipment and operations (Fiset  
103 2001). In the 1930's the Brewery opened "Les Voûtes Talon", a pub located in the  
104 historical vaults. Beer production came to an end after the events of 1966 where beer  
105 brewed in Québec City caused nearly 50 deaths in heavy drinkers over the course of a

106 few weeks. Public health authorities linked this to the use of cobalt sulfate as a stabilizer  
107 in the brewing process (Morin and Daniel 1967). The public relations disaster truly killed  
108 the brand brewed in Québec City (then labeled “Dow”) and lead to the complete shut  
109 down, in 1968, of the facility located on the same lot as Jean Talon’s brewery, ending a  
110 nearly 300 years long history.

111  
112 Here, we sequenced the genome of a yeast strain (Jean-Talon) that was isolated from  
113 the Second’s Intendants Palace’s vaults. We report the whole-genome sequence using  
114 short and long read sequencing and the comparative analysis of this genome with other  
115 sequenced genomes. Our results reveal that the strain is polyploid, partially sterile and  
116 harbors multiple aneuploidies. A phylogenetic analysis reveals that it is indeed a beer  
117 strain that is closely related to the other industrial beer and baking strains, suggesting  
118 that its origin dates from recent industrial activities on the site and not from earlier  
119 brewing activities.

120

## 121 **Materials and Methods**

### 122 **Strain sampling**

123 30 Yeast Mold Agar (YM) plates (Difco 271210) with 25ppm of chloramphenicol to  
124 prevent bacterial growth were prepared. 3 YM plates each were placed at 10 different  
125 locations in the vaults of the Intendant’s Palace of Nouvelle France in September 2010.  
126 At each location, the 3 YM plates were exposed to the environment for 10, 20 and 40  
127 minutes and then incubated at 28 °C for 2 days. The yeast strain was banked at the

128 Siebel culture collection as BRY # 480 and sent to the Landry laboratory for analysis in  
129 2019.

130

### 131 **DNA content and ploidy**

132 Measurement of DNA content was performed using flow cytometry and the SYTOX™  
133 green staining assay (Thermo Fisher, Waltham, USA) as done in (Charron *et al.* 2019).  
134 Cells were first thawed from glycerol stock and streaked on solid YPD in 6 petri dishes  
135 (room temperature, 3 days) to have isolated colonies. The strain BY4742 (haploid) and  
136 MG009 (BY4741xBY4742) (diploid) were used as controls. Liquid YPD cultures of 1 ml  
137 from 90 Jean-Talon isolated colonies and the two controls in 96-deepwell (2ml) plates  
138 were inoculated and incubated for 24 h at room temperature. Multiple colonies were  
139 considered to account for the possibility of an unstable ploidy. Cells were subsequently  
140 prepared as in (Gerstein *et al.* 2006). Cells were first fixed in 70% ethanol for at least 1  
141 h at room temperature. RNAs were eliminated from fixed cells using 0.25 mg/ml of  
142 RNase A overnight at 37°C. Cells were subsequently washed twice using sodium citrate  
143 (50mM, pH7) and stained with a final SYTOX™ green concentration of 0.6 µM for a  
144 minimum of 1 h at room temperature in the dark. The volume of cells was adjusted to be  
145 around a cell concentration of less than 500 cells/µL. Five thousand cells for each  
146 sample were analyzed on a Guava® easyCyte 8HT flow cytometer using a sample tray  
147 for 96-well microplates. Cells were excited with the blue laser at 488 nm and  
148 fluorescence was collected with a green fluorescence detection channel (peak at 512  
149 nm). The distributions of the green fluorescence values were processed to find the two

150 main density peaks, which correspond to the two cell populations, respectively, in G1  
151 and G2 phases. The data was analyzed using R version 3.4.159.

152

### 153 **Sporulation and dissection**

154 The frozen stock of the Jean-Talon strain was streaked for single colonies onto a fresh  
155 YPD agar plate (1% yeast extract, 2% glucose, 2% peptone, 2% agar). Three  
156 independent colonies were picked, and the cells were patched on a solid sporulation  
157 medium (1% Potassium acetate, 0.1% Yeast extract, 0.05% Glucose, 0.01% sporulation  
158 dropout, 2% Agar). The sporulation dropout was composed of 0.0125 g/L Histidine,  
159 0.0625g/L Leucine, 0.0125g/L Lysine and 0.0125g/L Uracil. After 7 days of incubation  
160 at room temperature, for each patch, a lump of cells was picked with a 200  $\mu$ L  
161 micropipette tip and resuspended into 100  $\mu$ L of a zymolyase solution (4U/ml of  
162 Zymolyase, Zymolyase 20T, Bioshop Canada). After 20 minutes, cells were centrifuged  
163 for 20 seconds at 16,100 g and the zymolyase solution was removed and replaced with  
164 100  $\mu$ L of a 1M sorbitol solution. For each of the initial colonies, 24 tetrads were  
165 dissected on fresh YPD plates with a SporePlay™ dissection microscope (Singer  
166 Instruments, Somerset, UK). After 5 days of incubation at room temperature, plates  
167 were photographed, and fertility was determined as the number of visible colonies to the  
168 naked eye.

169

### 170 **Short-read library construction and sequencing**

171 Genomic DNA was extracted from overnight culture derived from an isolated colony  
172 following



173 standard protocols (QIAGEN DNAeasy, Hilden, Germany). The library was prepared  
174 with the Illumina Nextera kit (Illumina, San Diego, USA) following the manufacturer's  
175 protocol and modifications described in (Baym *et al.* 2015). The library was sequenced  
176 with the 150 bp PE mode in a lane of HiSeqX (Illumina, San Diego, USA) at the  
177 Genome Quebec Innovation Center (Montréal, Canada). Genome-wide coverage  
178 reached 75x after duplicate reads removal. Raw sequencing reads are available at  
179 NCBI (PRJNA604588).

180

### 181 **Long-read library construction and sequencing**

182 DNA was extracted following a standard phenol-chloroform method from an overnight  
183 culture inoculated with an isolated colony of the Jean-Talon strain. PCR-free libraries for  
184 Oxford Nanopore Technologies (ONT) sequencing were prepared (in multiplex with  
185 other yeast strains) with kits SQK-LSK109 and EXP-NBD104 (Oxford Nanopore,  
186 Oxford, UK). Sequencing was performed on a FLO-MIN106 (revC) flowcell on a MinION  
187 sequencer (MIN-101B) driven by a MinIT computer (MNT-001) running the MinKNOW  
188 software v3.3.2. Basecalling was performed on the MinIT with guppy v3.0.3.  
189 Demultiplexing was performed using the guppy\_basecaller utility v3.1.5. Basecalled,  
190 demultiplexed reads are available at NCBI (PRJNA604588).

191

### 192 **Genotyping of the Jean-Talon strain**

193 Illumina reads were mapped onto the S288C *S. cerevisiae* reference genome vR64.2.1  
194 using bwa mem v0.7.17 (Li 2013). Duplicated reads were tagged using picard tools  
195 v2.18 (<http://broadinstitute.github.io/picard/>). Genotypes were called with GATK v3.8

196 (DePristo *et al.* 2011) using the HaplotypeCaller module with an option *-ERC*  
197 *BP\_RESOLUTION* and GenotypeGVCFs module with an option *--*  
198 *includeNonVariantSites*, with assumed ploidy 2. Single nucleotide polymorphisms  
199 (SNPs) were filtered with VariantFiltration module, excluding variants annotated with  
200 *QualbyDepth < 2, MappingQuality < 40, MappingQualityRankSumTest < -12.5,*  
201 *FisherStrand > 60, StrandOddsRatio > 3 and ReadPosRankSum < -8.0.* Additionally,  
202 genotypes with quality < 20 (both GQ and RGQ) and coverage < 10 reads were  
203 masked. Indels were excluded.

204

### 205 **Combining Jean-Talon SNPs with other datasets**

206 To combine variants of the Jean-Talon strain with the published yeast variants, VCF  
207 files with SNPs from (Fay *et al.* 2019) (hereafter “Fay et al. dataset”), and (Peter *et al.*  
208 2018) (hereafter “1000 yeast dataset”) were downloaded. All positions in the Jean-Talon  
209 file were filtered to keep those present in the Fay et al. and 1000 yeast datasets using  
210 bcftools v1.9 (Li *et al.* 2009), after adjusting chromosome names. The two datasets  
211 were combined with the Jean-Talon VCF file separately using GATK v3.8 (DePristo *et*  
212 *al.* 2011) *CombineVariants* module with an option *-genotypeMergeOptions UNIQUIFY.*  
213 Multiallelic SNPs were removed from respective merged datasets using bcftools v1.9.  
214 Principal Component Analysis was performed using *SNPrelate* (Zheng *et al.* 2012)  
215 package in R v3.6.1.

216

### 217 **Genotyping and comparison of beer strains**

218 To find yeast strains that are genetically closest to the Jean-Talon strain, we  
219 downloaded and mapped yeast genomes from genetic beer groups from 4 studies:  
220 (Gallone *et al.* 2016; Gonçalves *et al.* 2016; Peter *et al.* 2018; Fay *et al.* 2019)  
221 (Supplementary Table 1). In total we analyzed 319 strains, including the Jean-Talon  
222 strain. Reads from these strains were trimmed for the common Illumina adapters with  
223 Trimmomatic v0.36 (Bolger *et al.* 2014), and mapped to the S288C *S. cerevisiae*  
224 genome using bwa mem v0.7.17 (Li 2013). Duplicate reads were tagged with picard  
225 tools v2.18. SNPs were called and filtered with GATK v4.1, as described above, but  
226 excluding filters, which are affected by single end reads, such as FisherStrand and  
227 StrandOddsRatio. We retained only SNPs with less than 10% of missing data across all  
228 strains. The *SNPrelate* package (Zheng *et al.* 2012) in v3.6.1 was used to calculate  
229 identity by state and identity by descent. Neighbor-joining tree was built using identity by  
230 state matrix with package *ape*. Kinship coefficient matrix (identity by descent) was  
231 estimated with KING method of moment. To estimate nucleotide diversity and  
232 divergence between closely related strains, we genotyped all genomic positions in 5  
233 strains closely related to the Jean-Talon strain (A.Muntons, A.S-33, BE005, CFI and  
234 CFN; A.Windson was not included due to high amount of missing data), three other  
235 beer strains from the Beer/baking group (CHK, CFP, A.T-58) and one strain from the  
236 Ale2 group (A.2565) using GATK v4.1, as described above but with ploidy  $4n$  (except  
237 for CHK which is diploid). Genotypes passing all the filters were transferred on four (or  
238 two) reference genome sequences using seqtk v1.3 (<https://github.com/lh3/seqtk>),  
239 separately for each strain, and other positions were marked as missing data.  
240 Sequences of 6041 single exon, non-overlapping genes were extracted to generate

241 multiple sequence alignments with concatenated gene sequences using bedtools v2.25  
242 (Quinlan and Hall 2010) and custom python v3.6.8 scripts. Diversity statistics and  
243 number of synonymous sites were calculated using mstatspop v.0.1beta  
244 (<https://github.com/CRAGENOMICA/mstatspop>). To estimate the number of  
245 generations separating Jean-Talon and its closely related strains, we calculated time of  
246 divergence with a related strain, relative to the divergence time with S288C reference  
247 (Green *et al.* 2006; Skoglund *et al.* 2011). To estimate proportion of the branch length  
248 after split of Jean-Talon with the relative, we counted synonymous variants shared  
249 between Jean-Talon and S288C, but not with the relative, and variants shared between  
250 relative and the outgroup, but not with the Jean-Talon, and took the average and  
251 divided by the total number of synonymous sites. Shared synonymous variants were  
252 identified using custom python v3.6.8 script after annotating variants in VCF file using  
253 SnpEff (Cingolani *et al.* 2012). Divergence time with S288C was estimated with  
254 molecular clock, assuming mutation rate  $1.67E-10$  (Zhu *et al.* 2014), and considering  
255 only synonymous substitutions.

256

257 We obtained copy number profiles in 250 bp non-overlapping windows and in all genes  
258 with Control-FREEC v11.5 (Boeva *et al.* 2011, 2012). First, we estimated ploidy of each  
259 strain using nQuire using reads with mapping quality  $> 30$ , and *Irdmodel* option (Weiß *et*  
260 *al.* 2018). However, some estimates of ploidy were not consistent with prior information,  
261 therefore we used ratios of coverage obtained with Control-FREEC instead of inferred  
262 copy numbers. Control-FREEC was run using options *breakPointThreshold* = 0.8,  
263 *minExpectedGC* = 0.35, *maxExpectedGC* = 0.55, *telocentromeric* = 7000 and window

264 size set to 250 bp. To estimate the ratio of coverage in maltose metabolic process  
265 genes (GO:0000023), we averaged coverage ratio for windows overlapping each gene.  
266 Strains with average genome coverage below 10x were excluded. The reference  
267 genome lacks some of the maltose genes, such as *MAL4* or *MAL6*, which are  
268 homologous to other *MAL* genes, and in case of their presence in the genome, could  
269 potentially affect read coverage of *MAL* genes. Although we cannot precisely estimate  
270 the number of copies of maltose metabolism genes, we can use our approach to  
271 roughly distinguish different categories of beer strains.

272

### 273 **Detecting introgression from *Saccharomyces* species**

274 To detect potential gene flow between the Jean-Talon strain and other *Saccharomyces*  
275 species, we performed competitive mapping using SppIDER (last download 29/09/2019,  
276 (Langdon *et al.* 2018). In the first analysis, we concatenated genome assemblies of 8  
277 *Saccharomyces* species: *S. paradoxus*, *S. cerevisiae*, *S. eubayanus*, *S. jurei*, *S.*  
278 *kudriavzevii*, *S. mikatae*, *S. uvarum* and *S. arboricolus*. In the second analysis, we  
279 combined genome assemblies of 6 lineages of *S. paradoxus* and the genome of *S.*  
280 *cerevisiae* S288C. All assemblies were masked using RepeatMasker v4.0.7  
281 (<http://www.repeatmasker.org>) prior to the analysis.

282

### 283 **Assembly of the Jean-Talon genome**

284 We assembled the Jean-Talon genome using the ONT dataset. We used wtdbg2 v2.5  
285 (Ruan and Li 2019) with parameters -x ont -g 12m. The ONT reads were mapped  
286 against the draft assembly using minimap2 v2.17 (Li 2018) with parameter -x map-ont.

287 The draft assembly was then polished using Nanopolish v0.11.1 (Loman *et al.* 2015)  
288 with parameter --min-candidate-frequency 0.1. Illumina reads were mapped against the  
289 signal-level polished assembly using bwa mem v0.7.16 (Li 2013) and the alignment was  
290 used to further polish the assembly using Pilon v1.22 (Walker *et al.* 2014). The polished  
291 assembly was aligned to the S288c reference genome from Yue *et al.* (Yue *et al.* 2017)  
292 using Mauve v2.4.0 (Darling *et al.* 2010), following which contigs were reordered to  
293 match reference chromosomes. Contig ctg6\_pilon was manually split at the Ty2 junction  
294 as our structural analysis provided no support for the assembled translocation (see  
295 below). Visualization of translocations were produced with the Mauve GUI. The  
296 assembly is available at NCBI (PRJNA604588).

297

### 298 **Simulation of translocations in the S288c genome**

299 The S288c genome was used to simulate three reciprocal translocations. Our goal was  
300 to estimate the power of a split mapping approach to detect rearrangements occurring  
301 at full-length Ty retrotransposon loci, since those are large (~6kb) dispersed repeats  
302 which are expected to produce non-unique mappings. Using the genome annotations of  
303 Yue *et al.* (Yue *et al.* 2017) (coordinates are shown in parenthesis), two pairs of same-  
304 strand, full-length Ty1 elements were selected. Translocations were simulated between  
305 members of a pair using a custom python v3.7.1 script. The first translocation is  
306 between a subtelomeric Ty1 on chromosome VIII (562107-568134) and a Ty1 on  
307 chromosome XIII (378473-384398). The second translocation is between Ty1s on  
308 chromosomes IV (1214433-1220350) and XIV (512688-518577). A third translocation  
309 with genic breakpoints was simulated between YER068W on chromosome V (293281-

310 295044) and YJR010W on chromosome X (462156-463691). The rearranged assembly  
311 harboring the three translocations was used to simulate PacBio reads using PBSIM  
312 v1.0.4 (Ono *et al.* 2013) with parameters --data-type CLR --depth 600 --length-mean  
313 3000 --length-sd 2300 and the default error model.

314

### 315 **Structural variants (SVs) analysis using long reads**

316 ONT reads for Jean-Talon (this study), PacBio reads for A.2565, A.T-58 (Fay *et al.*  
317 2019) and S288c (Yue *et al.* 2017) and simulated PacBio reads for S288c were filtered  
318 with SeqKit (Shen *et al.* 2016) to keep read lengths between 8kb and 20kb inclusively.  
319 The filtered reads were mapped on the S288c reference genome (Yue *et al.* 2017)  
320 using minimap2 v2.17 with parameters -x map-ont or -x map-pb. SVIM v1.1.1 (Heller  
321 and Vingron 2019) was used to call five classes of SVs (deletions, insertions, tandem or  
322 interspersed duplications, inversions) based on the long-read alignments. Since the  
323 coverage depth of the Jean-Talon library was higher (59X) than that of A.2565 (9X) and  
324 A.T-58 (12X), the Jean-Talon library was randomly subsampled to approximately 9X  
325 using seqtk (<https://github.com/lh3/seqtk>) to correct for potential coverage depth biases  
326 in the detection of SVs. SVs supported by a number of reads lower than 15% of the  
327 coverage depth were filtered out. For each strain, we derived the distribution of physical  
328 distances from an SV call to the closest SV call of the same class in each of the other  
329 strains. Using the distribution of distances between the two Jean-Talon datasets (59X  
330 and 9X coverage depth) as a reference, we used one-sided Mann-Whitney U tests to  
331 determine which distributions were significantly shifted towards larger distances.

332 Interspersed duplications and inversions were excluded from this analysis, as they  
333 comprised few or no calls across the datasets.

334

### 335 **Translocation analysis using split mapping**

336 Long-read split mappings were used to search for translocations in the Jean-Talon,  
337 A.2565 and A.T-58 genomes compared to S288c. From the previously described long-  
338 read alignments, we extracted read IDs which had supplementary mappings and no  
339 secondary mapping using samtools v1.9 (Li *et al.* 2009). The alignments were filtered  
340 according to these read IDs using picard FilterSamReads v2.18.5  
341 (<http://broadinstitute.github.io/picard/>) and subsequently analyzed using custom python  
342 v3.7.1 scripts. Keeping only the split reads which map to exactly 2 different  
343 chromosomes, we binned them in 20kb non-overlapping windows and represented read  
344 segment mappings with heatmaps. The length of the supporting reads was used to  
345 convert counts of supporting reads into approximate fraction of genome-wide coverage  
346 depth. Mappings of the S288c PacBio dataset against the reference S288c assembly  
347 allowed to identify artefactual signals arising from the split mapping approach. Mappings  
348 of the S288c simulated PacBio dataset against the reference S288c assembly allowed  
349 to compare the power of the split mapping approach to detect translocations at Ty and  
350 genic breakpoints.

351

352



## 353 **Results and Discussion**

354 The colonies grown on YPD medium were creamy-beige round colonies, convex  
355 elevation, and matt finish, quite smooth and creamy surface. The diameter of most  
356 colonies is around 3 mm (Supplementary Figure 1). Under the microscope the cells  
357 looked round, medium and uniform in size and shape and arranged in clusters  
358 (Supplementary Figure 1), consistent with being *S. cerevisiae*.

### 359 **The Jean-Talon strain is a tetraploid strain and largely sterile**

360 We first examine the ploidy and ability to sporulate of the Jean-Talon strain. DNA  
361 staining of 90 isolated colonies shows that it is a tetraploid (Figure 1A). Tetraploidy is  
362 also suggested based on the observed frequency distributions of single nucleotide  
363 polymorphisms (SNPs) mapped to the S288C genome that show peaks around  
364 frequencies of 0.25, 0.5 and 0.75 (Figure 1B). A recent study of the genome of 1011 *S.*  
365 *cerevisiae* isolates revealed that most of the natural isolates are diploid (Peter *et al.*  
366 2018). However, approximately 11.5% of isolates are polyploid ( $3-5n$ ) and those are  
367 enriched in specific subpopulations such as the beer, mixed-origin and African palm  
368 wine clades, which strongly suggests that some human-related environments have had  
369 an effect on the ploidy level (Peter *et al.*, 2018). Similar results from (Gallone *et al.*  
370 2016) and (Gonçalves *et al.* 2016) showed that multiple populations of beer strains  
371 show high rates of tetraploidy. Although spontaneous yeast tetraploids are usually fertile  
372 (Charron *et al.* 2019), the Jean-Talon strain shows about 30% spore viability (Figure  
373 1C) and is close to the average spore viability observed for beers from the genetic

374 groups Beer2, Mixed and Mosaic in (Gallone *et al.* 2016). The Jean-Talon is therefore  
375 typical of beer strains with respect to ploidy and fertility.

376

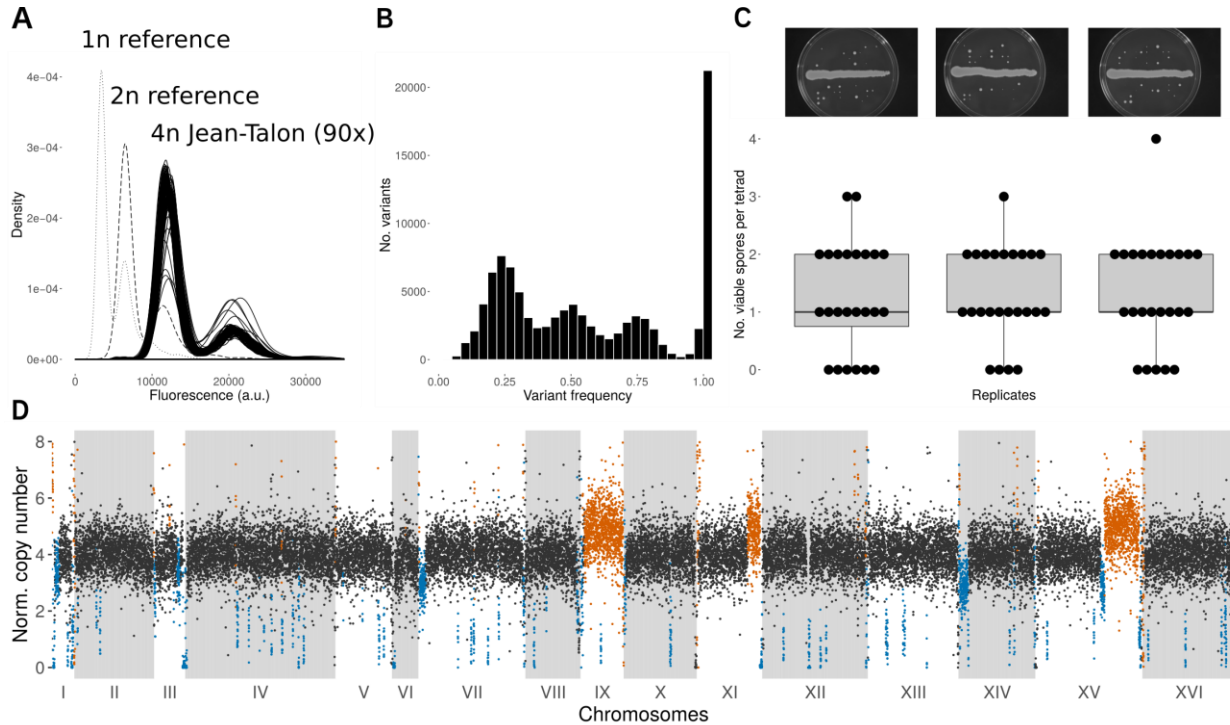

377

378 **Figure 1** The Jean-Talon strain is a tetraploid with reduced spore viability. (A) DNA staining and  
379 fluorescence measured for 90 colonies of the Jean-Talon strain shows peaks around the expected ploidy  
380 of  $4n$ . (B) Frequency of SNPs of the Jean-Talon strain reads mapped to *Saccharomyces cerevisiae* S288C  
381 genome. (C) Boxplots and numbers of viable spores per tetrad found in 3 biological replicates of sporulated  
382 cultures. Pictures of the spore dissection plates for the corresponding replicates are shown above. (D) Copy  
383 number profile up to  $8n$  of the genome of Jean-Talon strain measured in 250 bp windows. Black windows  
384 correspond to the expected ploidy  $4n$ , orange windows correspond to copy number gains and blue windows  
385 to copy number losses. Long stretches of copy number gains and losses correspond to ploidy of  $5n$  and  
386  $3n$ , respectively.

387

388 Several long-range copy number gains and losses were observed in the genome,  
389 including the presence of 5 copies of chromosome IX, similar copy number changes at  
390 the ends of chromosomes XI and XV, and 3 copies at the beginning of chromosomes I,

391 VII, XIV and middle of chromosome XV (Figure 1D). The aneuploidies and CNVs are  
392 typical of what is observed for industrial yeast strains (Gallone *et al.* 2016), but that are  
393 rare in species that have not been domesticated (Leducq *et al.* 2016) (Yue *et al.* 2017).

394

### 395 **The Jean-Talon strain belongs to the Beer/baking beer group**

396 To find out to which genetic group Jean-Talon belongs to, we combined SNPs of the  
397 Jean-Talon strain with two yeast datasets: 401 strains from Fay *et al.* (Fay *et al.* 2019),  
398 and 1011 strains from 1000 yeast (Peter *et al.* 2018). Principal Component Analysis  
399 (PCA) on the Fay *et al.* dataset shows that Jean-Talon groups with the beer strains from  
400 the Beer/baking group according to PC2 and PC3 (Figure 2A), whereas PCA on the  
401 1000 yeast dataset shows Jean-Talon grouping with the Mixed origin group, according  
402 to PC7 and PC8 (Figure 2B). The Mixed origin and Beer/baking groups comprise strains  
403 obtained from bakeries, breweries, as well as strains found in nature. Because the  
404 Jean-Talon strain was isolated from the environment, it may have mixed with other  
405 species, particularly *S. paradoxus*, which is found in Northern parts of North America  
406 (Charron *et al.* 2014) and with which it was shown to hybridize in different contexts  
407 (Barbosa *et al.* 2016). We did not detect gene-flow between the Jean-Talon and other  
408 *Saccharomyces* species using competitive mapping (Supplementary Figure 2).

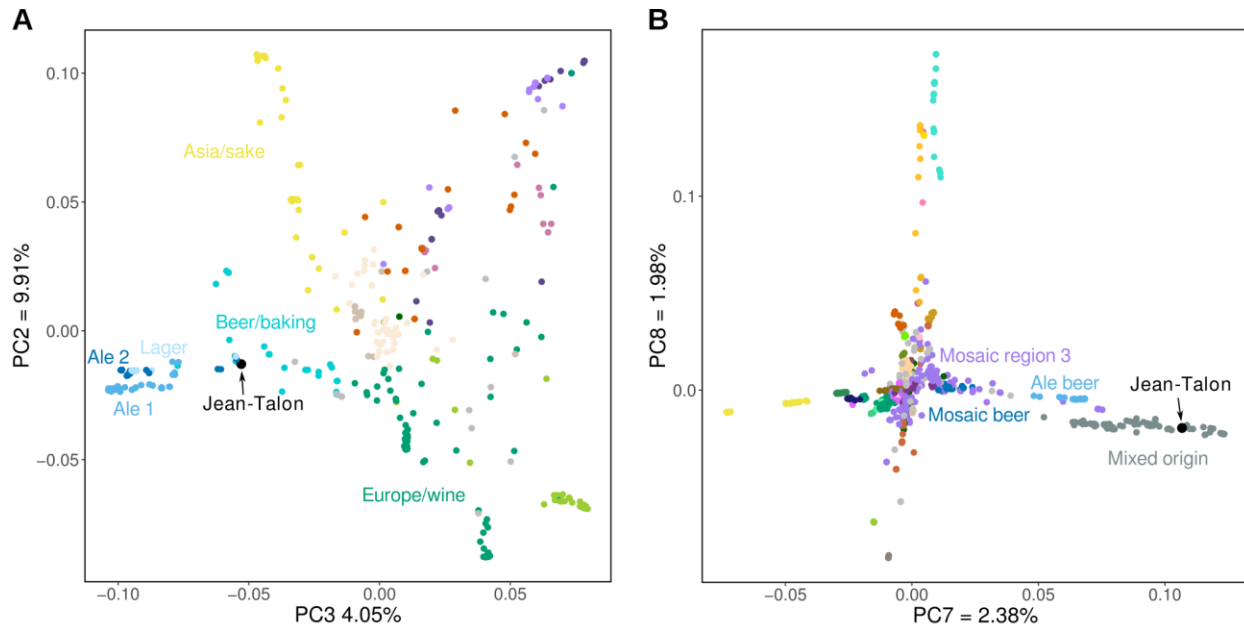

409

410 **Figure 2** SNPs suggest that Jean-Talon belongs to the Beer/baking beer group. (A) PCA with 273,955  
411 biallelic SNPs from 402 yeast strains from Fay et al. dataset groups Jean-Talon within the Beer/baking  
412 group. (B) PCA with 1,545,361 biallelic SNPs from 1000 yeast dataset (1013 yeast strains) groups Jean-  
413 Talon within the Mixed origin group.

414

415 To further investigate the Jean-Talon strain and identify the most closely related beer  
416 strains, we mapped the reads of 318 strains from 4 different studies, which include  
417 major beer groups (Supplementary Table 1) (Gallone *et al.* 2016; Gonçalves *et al.* 2016;  
418 Peter *et al.* 2018; Fay *et al.* 2019). Based on genotype similarity, the Jean-Talon strain  
419 is located on a branch composed of commercial beer strains (Figure 3A). According to  
420 the kinship coefficients, the strain is nearly identical (kinship coefficient between 93%  
421 and 97%) to the six other beer strains (Figure 3B), which include ales from England and  
422 Belgium (Supplementary Table 1). Estimates of synonymous heterozygosity and  
423 pairwise divergence between these strains support the finding that most segregating  
424 variants in the Jean-Talon are shared with other strains (Figure 3C). Using molecular  
425 clock, the time of divergence between Jean-Talon and S288C reference genome strain

426 is about 14.4 M generations. Assuming constant mutation rate, the time of divergence of  
427 Jean-Talon from the closely related strains is equal to a fraction of  $6.2E-05$  of  
428 divergence time with S288C, which translates to 708 to 1080 generations, depending on  
429 the strain. The suggested number of generations per year in domesticated and lab  
430 yeast ranges from 150 (Gallone *et al.* 2016) to 2920 per year (Fay and Benavides  
431 2005), however the growth of Jean-Talon could have been impeded when it stayed in  
432 the vaults. Moreover, generation time can be overestimated if breweries use the same  
433 yeast stock for each batch of fermentation, instead of continuously transferring yeast  
434 from one fermentation to the next. Although we do not know for how long the strain was  
435 dormant within the vaults, a small number of generations suggests that the split with  
436 other beer strains has not occurred long time ago. It is likely that the strain was used in  
437 the Boswell brewery which was still active in the 60s of the 20th century. Strains related  
438 to Jean-Talon were sampled from commercial ales, brewed from general purpose  
439 common yeast strains used for brewing different styles of beer, therefore they could  
440 have originated in the large commercial brewery.

441

442

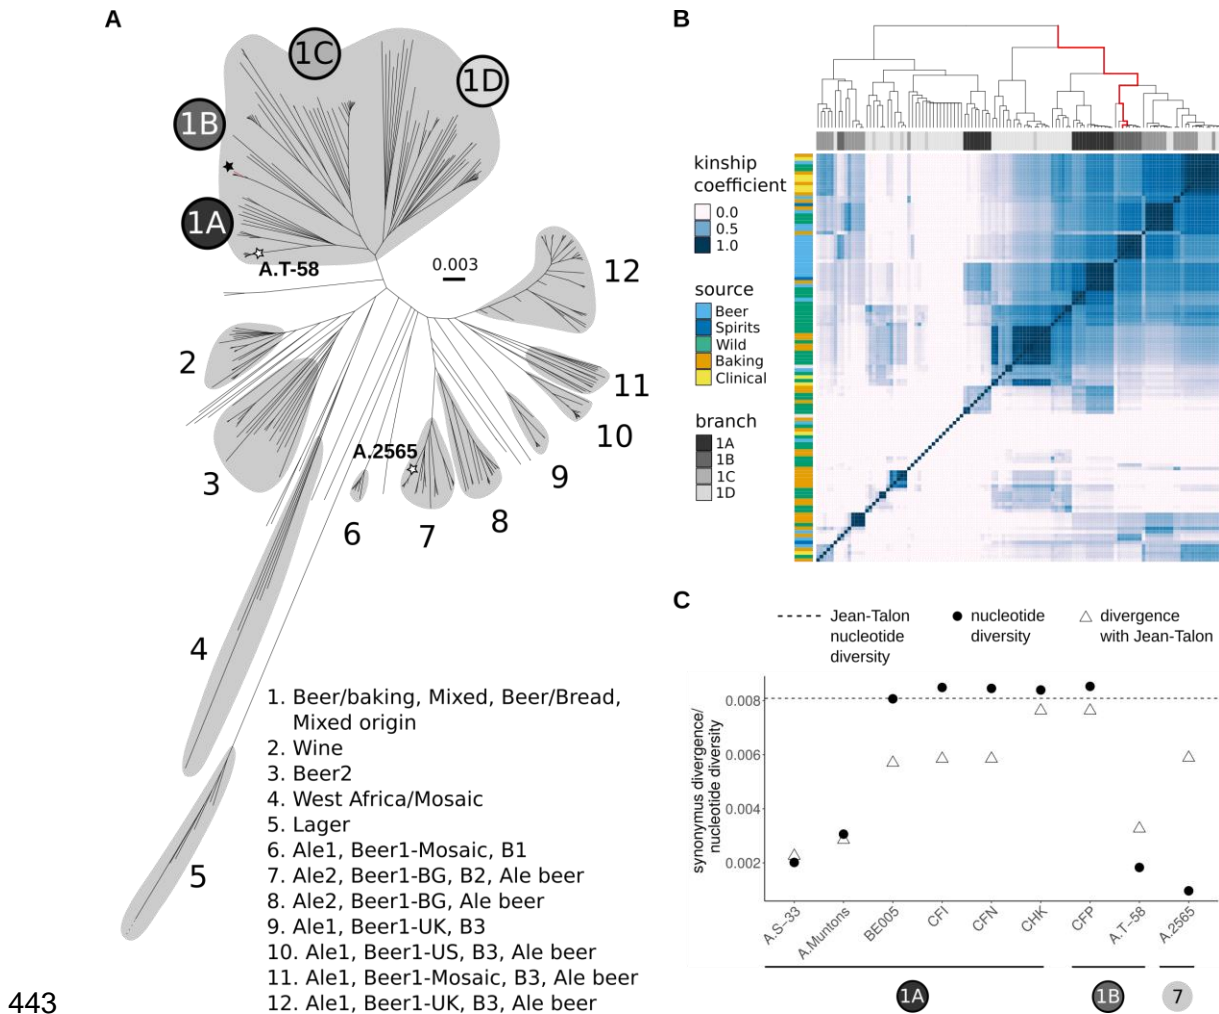

443

444 **Figure 3** Jean-Talon is closely related to several commercial beer strains from the Beer/baking group. (A)  
 445 Neighbor joining tree based on genome-wide genotype dissimilarity matrix for beer yeast strains from the  
 446 four studies, Fay et al. 2018 (Ale1, Ale2, Lager, Beer/baking), Gallone et al. 2016 (Beer1\*, Beer2, Mixed,  
 447 Wine, West Africa, \*Mosaic), Goncalves et al. 2016 (B1, B2, B3, Beer/Bread) and Peter et al. 2018 (Mixed  
 448 origin, Ale beer). Consecutive numbers describe group affiliation of larger branches according to different  
 449 studies. Note that one longest branch of the lager strain was cut to fit in the figure (dotted lines). The strain  
 450 of Jean-Talon within the Beer/baking group is depicted with a black star, white stars depict the location of  
 451 two beer strains with long-read sequencing data. (B) Heatmap of kinship coefficients estimated for all pairs  
 452 of Beer/baking strains with 131,808 genome-wide SNPs. The Jean-Talon strain (red line on a dendrogram)  
 453 has a kinship coefficient above 93% with 6 beer strains: CFI, CFN, BE005, A.Muntons, A.S-33, and  
 454 A.Windson. (C) Nucleotide diversity in Jean-Talon strain is higher than divergence between most closely  
 455 related beer strains, suggesting that many segregating variants are shared between the strains. Circles  
 456 with numbers depict tree branches from (A).

457

## 458 **Distinct structural variation of the Jean-Talon strain**

459 The profiles of copy number variation across the genomes of the related strains show  
460 multiple aneuploidies, mostly shared with the Jean-Talon strain, supporting their recent  
461 divergence (Supplementary Figure 3). The important exception is a 350 kb region with 5  
462 copies located on chromosome XV. We examined specifically the copy number of genes  
463 that have been associated with adaptation of beer strains to the brewing environment, for  
464 instance maltose metabolism genes. Hierarchical clustering of the beer strains based on  
465 the number of copies in genes involved in maltose metabolic process groups Jean-Talon  
466 and its related strains with undefined ale beers from Belgium and England and lagers  
467 (Figure 4). We called five classes of structural variants (SVs) based on mappings of long  
468 reads to the S288c reference genome (Figure 5A). Distributions of physical proximity of  
469 SV calls between strains show that Jean-Talon is closer to a strain from the Beer/baking  
470 group (A.T-58), rather than to a strain from the Ale2 group (A.2565, Figure 5B). Despite  
471 this relatedness, the Jean-Talon strain exhibits a distinct pattern of SVs as it is  
472 significantly different from both beer strains for the most abundant classes of SVs  
473 (insertions and deletions, Figure 5B).

474



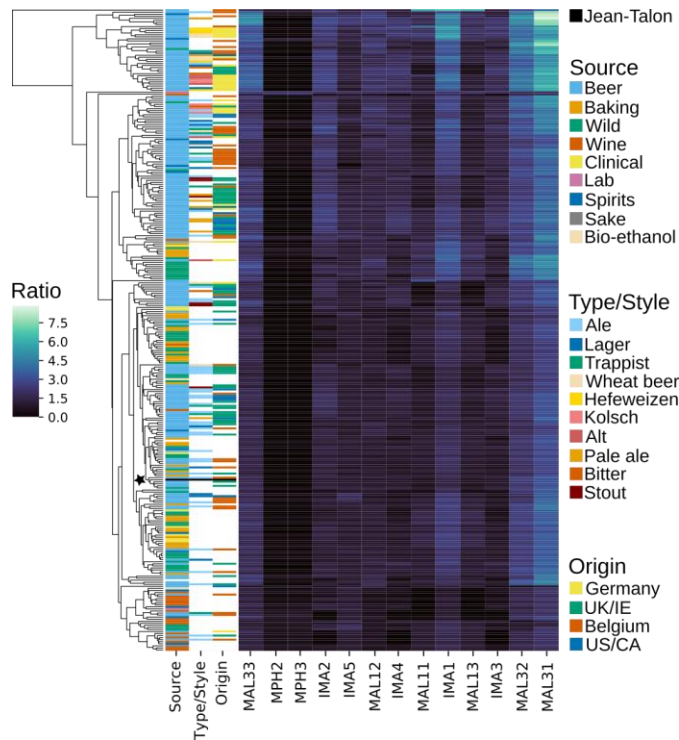

475

476 **Figure 4** Clustering of copy number variation in genes involved in maltose metabolic processes place Jean-  
477 Talon among Belgium and English ales and lagers. Ratio indicates copy number change relative to the  
478 strain ploidy. Beer styles, types and origin differentiate in the matrix mainly according to changes in copy  
479 number in *MAL3* and *IMA1* genes. Black star and line depict location of the Jean-Talon strain.

480



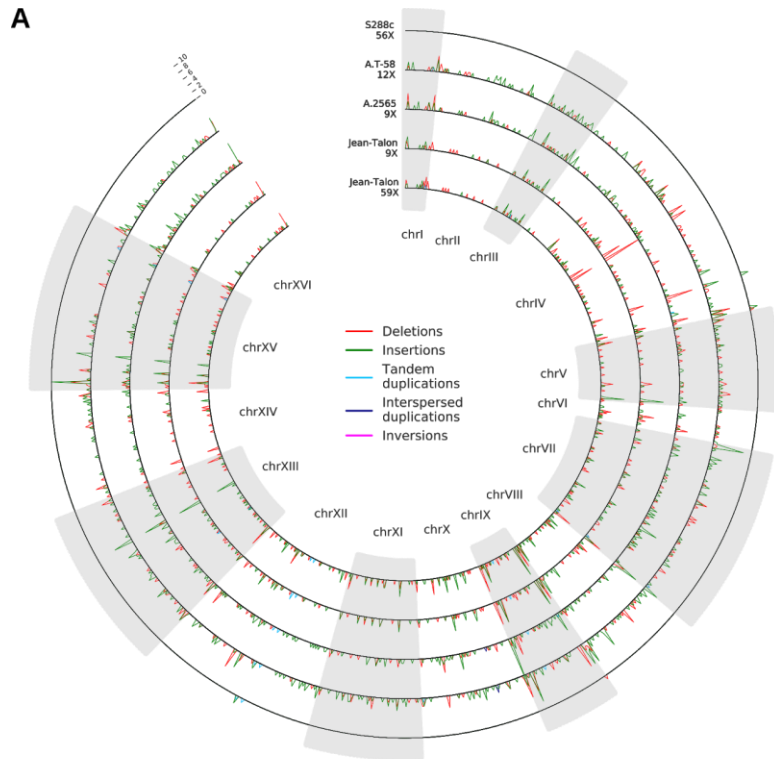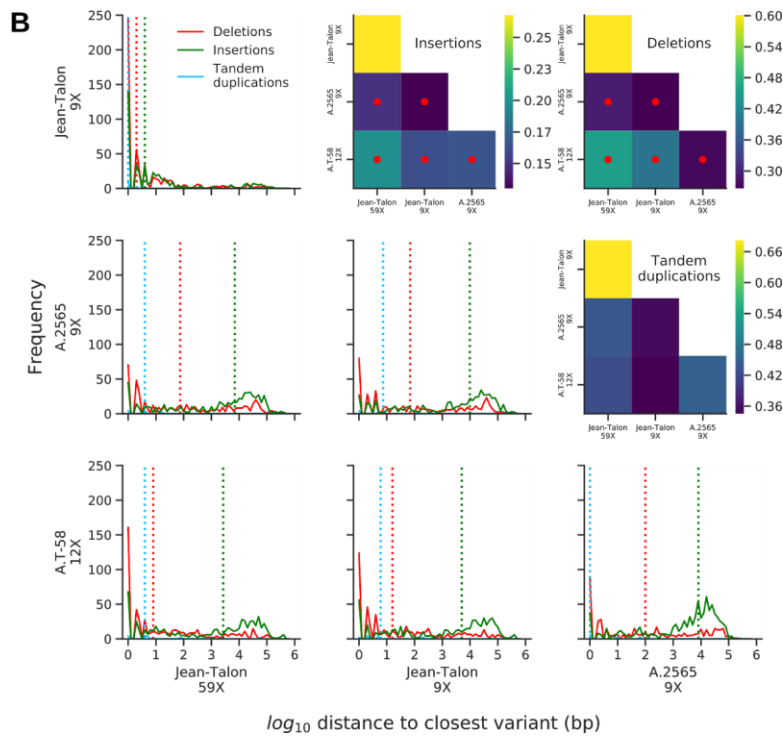

481

482 **Figure 5** Structural variation in the genome of the Jean-Talon strain. (A) SVs against S288c for the Jean-  
483 Talon strain (complete and subsampled datasets), and two beer strains with available long read datasets,  
484 one from the Beer/baking group (A.T-58) and one from the Ale2 group (A.2565). SV density in non-  
485 overlapping 10 kb windows is plotted. (B) Physical proximity of SV calls between strains. Distributions of  
486 physical distance to the closest same-class SV call in the mate strain is shown for each pair of strains.  
487 Dotted vertical lines correspond to medians. Heatmaps show the results of two-sided Mann-Whitney U tests  
488 for each distribution compared to the (Jean-Talon 9X: Jean-Talon 59X) reference pair. Color maps show  
489 ratios of U statistics to the reference, while red dots indicate distributions significantly right-shifted compared  
490 to the reference (p-values<0.05, Mann-Whitney U tests, FDR corrected).

491  
492 We assembled the Jean-Talon genome using our Oxford Nanopore dataset and  
493 detected a translocation between chromosomes II and XI (Supplementary Figure 4),  
494 which breakpoint maps to a full-length Ty2 retrotransposon. We used split mappings of  
495 long reads to investigate translocations in the Jean-Talon, A.T-58 and A.2565 strains  
496 compared to S288c (Supplementary Figure 5). Although we found this method has  
497 reduced power to detect translocations at Ty loci compared to genic breakpoints, we  
498 find no evidence for a translocation between chromosomes II and XI in Jean-Talon  
499 (Supplementary Figure 6). Thus, this translocation is likely an assembly artefact and the  
500 genomes of Jean-Talon and S288c appear to be collinear.

501

## 502 **Conclusion**

503 The yeast Jean-Talon strain was isolated from an archeological site in the old part of  
504 Québec City where the first brewery was founded in the 17th century. The strain was  
505 isolated from the vaults of the second Intendant's palace that was built in the 18th  
506 century and occupied by the Boswell brewery starting in the 19th century. The Jean-

507 Talon strain is a strain of *Saccharomyces cerevisiae*, which is not found naturally in this  
508 part of North America (Charron *et al.* 2014). The strain is very closely related to other  
509 strains used in industrial brewing, suggesting that it derived recently from other  
510 industrial beer strains.

511

## 512 **Acknowledgements**

513 We thank members of the Landry lab for input on the project. This work was funded by  
514 a Natural Sciences and Engineering Research Council of Canada (NSERC) Discovery  
515 grant to CRL. AF was supported by a Genome Canada Grant (LSARP BIOSAFE), MH  
516 was supported by a NSERC Alexander Graham Bell graduate fellowship and SM by a  
517 Fonds de recherche santé Québec (FRSQ) postdoctoral fellowship. CRL holds the  
518 Canada Research Chair in Evolutionary Cell and Systems Biology.

519

520

## 521 **References**

- 522 Barbosa, R., P. Almeida, S. V. B. Safar, R. O. Santos, P. B. Morais *et al.*, 2016  
523 Evidence of natural hybridization in Brazilian wild lineages of *Saccharomyces*  
524 *cerevisiae*. *Genome Biol. Evol.* 8: 317–329.
- 525 Baym, M., S. Kryazhimskiy, T. D. Lieberman, H. Chung, M. M. Desai *et al.*, 2015  
526 Inexpensive multiplexed library preparation for megabase-sized genomes. *PLoS*  
527 *One* 10: e0128036.
- 528 Boeva, V., T. Popova, K. Bleakley, P. Chiche, J. Cappelletti *et al.*, 2012 Control-FREEC: a  
529 tool for assessing copy number and allelic content using next-generation  
530 sequencing data. *Bioinformatics* 28: 423–425.
- 531 Boeva, V., A. Zinovyev, K. Bleakley, J.-P. Vert, I. Janoueix-Lerosey *et al.*, 2011 Control-  
532 free calling of copy number alterations in deep-sequencing data using GC-content  
533 normalization. *Bioinformatics* 27: 268–269.
- 534 Bolger, A. M., M. Lohse, and B. Usadel, 2014 Trimmomatic: a flexible trimmer for  
535 Illumina sequence data. *Bioinformatics* 30: 2114–2120.
- 536 Cavalieri, D., P. E. McGovern, D. L. Hartl, R. Mortimer, and M. Polsinelli, 2003 Evidence  
537 for *S. cerevisiae* fermentation in ancient wine. *J. Mol. Evol.* 57 Suppl 1: S226–32.
- 538 Charron, G., J.-B. Leducq, C. Bertin, A. K. Dubé, and C. R. Landry, 2014 Exploring the  
539 northern limit of the distribution of *Saccharomyces cerevisiae* and *Saccharomyces*  
540 *paradoxus* in North America. *FEMS Yeast Res.* 14: 281–288.
- 541 Charron, G., S. Marsit, M. Hénault, H. Martin, and C. R. Landry, 2019 Spontaneous  
542 whole-genome duplication restores fertility in interspecific hybrids. *Nat. Commun.*  
543 10: 4126.

- 544 Cingolani, P., A. Platts, L. L. Wang, M. Coon, T. Nguyen *et al.*, 2012 A program for  
545 annotating and predicting the effects of single nucleotide polymorphisms, SnpEff:  
546 SNPs in the genome of *Drosophila melanogaster* strain w1118; iso-2; iso-3. *Fly* 6:  
547 80–92.
- 548 Darling, A. E., B. Mau, and N. T. Perna, 2010 progressiveMauve: multiple genome  
549 alignment with gene gain, loss and rearrangement. *PLoS One* 5: e11147.
- 550 DePristo, M. A., E. Banks, R. Poplin, K. V. Garimella, J. R. Maguire *et al.*, 2011 A  
551 framework for variation discovery and genotyping using next-generation DNA  
552 sequencing data. *Nat. Genet.* 43: 491–498.
- 553 Fay, J. C., and J. A. Benavides, 2005 Evidence for domesticated and wild populations  
554 of *Saccharomyces cerevisiae*. *PLoS Genet.* 1: 66–71.
- 555 Fay, J. C., P. Liu, G. T. Ong, M. J. Dunham, G. A. Cromie *et al.*, 2019 A polyploid  
556 admixed origin of beer yeasts derived from European and Asian wine populations.  
557 *PLoS Biol.* 17: e3000147.
- 558 Fiset, R., 2001 Brasseries et distilleries à Québec (1620-1900): profil d'archéologie  
559 industrielle.
- 560 Gallone, B., J. Steensels, T. Prael, L. Soriaga, V. Saels *et al.*, 2016 Domestication and  
561 Divergence of *Saccharomyces cerevisiae* Beer Yeasts. *Cell* 166: 1397–1410.e16.
- 562 Gerstein, A. C., H.-J. E. Chun, A. Grant, and S. P. Otto, 2006 Genomic convergence  
563 toward diploidy in *Saccharomyces cerevisiae*. *PLoS Genet.* 2: e145.
- 564 Gonçalves, M., A. Pontes, P. Almeida, R. Barbosa, M. Serra *et al.*, 2016 Distinct  
565 Domestication Trajectories in Top-Fermenting Beer Yeasts and Wine Yeasts. *Curr.*  
566 *Biol.* 26: 2750–2761.

- 567 Green, R. E., J. Krause, S. E. Ptak, A. W. Briggs, M. T. Ronan *et al.*, 2006 Analysis of  
568 one million base pairs of Neanderthal DNA. *Nature* 444: 330–336.
- 569 Guimont, J., 1987 Le site du Premier palais de l'intendant à Québec (Ce Et 30): rapport  
570 préliminaire de la quatrième campagne de fouilles (1985).
- 571 Heller, D., and M. Vingron, 2019 SVIM: structural variant identification using mapped  
572 long reads. *Bioinformatics* 35: 2907–2915.
- 573 Langdon, Q. K., D. Peris, B. Kyle, and C. T. Hittinger, 2018 sppIDer: A Species  
574 Identification Tool to Investigate Hybrid Genomes with High-Throughput  
575 Sequencing. *Mol. Biol. Evol.* 35: 2835–2849.
- 576 Leducq, J.-B., L. Nielly-Thibault, G. Charron, C. Eberlein, J.-P. Verta *et al.*, 2016  
577 Speciation driven by hybridization and chromosomal plasticity in a wild yeast. *Nat*  
578 *Microbiol* 1: 15003.
- 579 Li, H., 2013 Aligning sequence reads, clone sequences and assembly contigs with  
580 BWA-MEM. *arXiv [q-bio.GN]*.
- 581 Li, H., 2018 Minimap2: pairwise alignment for nucleotide sequences. *Bioinformatics* 34:  
582 3094–3100.
- 583 Li, H., B. Handsaker, A. Wysoker, T. Fennell, J. Ruan *et al.*, 2009 The Sequence  
584 Alignment/Map format and SAMtools. *Bioinformatics* 25: 2078–2079.
- 585 Loman, N. J., J. Quick, and J. T. Simpson, 2015 A complete bacterial genome  
586 assembled de novo using only nanopore sequencing data. *Nat. Methods* 12: 733–  
587 735.
- 588 Ludlow, C. L., G. A. Cromie, C. Garmendia-Torres, A. Sirr, M. Hays *et al.*, 2016  
589 Independent Origins of Yeast Associated with Coffee and Cacao Fermentation.

590 Curr. Biol. 26: 965–971.

591 Marsit, S., J.-B. Leducq, É. Durand, A. Marchant, M. Filteau *et al.*, 2017 Evolutionary  
592 biology through the lens of budding yeast comparative genomics. Nat. Rev. Genet.  
593 18: 581–598.

594 McGovern, P. E., J. Zhang, J. Tang, Z. Zhang, G. R. Hall *et al.*, 2004 Fermented  
595 beverages of pre- and proto-historic China. Proc. Natl. Acad. Sci. U. S. A. 101:  
596 17593–17598.

597 Michel, R. H., P. E. McGovern, and V. R. Badler, 1992 Chemical evidence for ancient  
598 beer. Nature 360: 24–24.

599 Morin, Y., and P. Daniel, 1967 Quebec beer-drinkers' cardiomyopathy: etiological  
600 considerations. Can. Med. Assoc. J. 97: 926–928.

601 Moussette, M., 1992 La bière à l'époque de Jean-Talon. Cap-aux-Diamants: La revue  
602 d'histoire du Québec 18–20.

603 Moussette, M., 1994 *Le site du Palais de l'intendant à Québec: genèse et structuration*  
604 *d'un lieu urbain*. Les éditions du Septentrion.

605 Moussette, M., 1996 The site of the intendant's palace in Québec City: The changing  
606 meaning of an urban space. Hist. Archaeol. 30: 8–21.

607 Ono, Y., K. Asai, and M. Hamada, 2013 PBSIM: PacBio reads simulator--toward  
608 accurate genome assembly. Bioinformatics 29: 119–121.

609 Peter, J., M. De Chiara, A. Friedrich, J.-X. Yue, D. Pflieger *et al.*, 2018 Genome  
610 evolution across 1,011 *Saccharomyces cerevisiae* isolates. Nature 556: 339–344.

611 Quinlan, A. R., and I. M. Hall, 2010 BEDTools: a flexible suite of utilities for comparing  
612 genomic features. Bioinformatics 26: 841–842.

- 613 Ruan, J., and H. Li, 2019 Fast and accurate long-read assembly with wtdbg2. Nat.  
614 Methods.
- 615 Shen, W., S. Le, Y. Li, and F. Hu, 2016 SeqKit: A Cross-Platform and Ultrafast Toolkit  
616 for FASTA/Q File Manipulation. PLoS One 11: e0163962.
- 617 Skoglund, P., A. Götherström, and M. Jakobsson, 2011 Estimation of population  
618 divergence times from non-overlapping genomic sequences: examples from dogs  
619 and wolves. Mol. Biol. Evol. 28: 1505–1517.
- 620 Walker, B. J., T. Abeel, T. Shea, M. Priest, A. Abouelliel *et al.*, 2014 Pilon: an integrated  
621 tool for comprehensive microbial variant detection and genome assembly  
622 improvement. PLoS One 9: e112963.
- 623 Weiß, C. L., M. Pais, L. M. Cano, S. Kamoun, and H. A. Burbano, 2018 nQuire: a  
624 statistical framework for ploidy estimation using next generation sequencing. BMC  
625 Bioinformatics 19: 122.
- 626 Yue, J.-X., J. Li, L. Aigrain, J. Hallin, K. Persson *et al.*, 2017 Contrasting evolutionary  
627 genome dynamics between domesticated and wild yeasts. Nat. Genet. 49: 913–  
628 924.
- 629 Zheng, X., D. Levine, J. Shen, S. M. Gogarten, C. Laurie *et al.*, 2012 A high-  
630 performance computing toolset for relatedness and principal component analysis of  
631 SNP data. Bioinformatics 28: 3326–3328.
- 632 Zhu, Y. O., M. L. Siegal, D. W. Hall, and D. A. Petrov, 2014 Precise estimates of  
633 mutation rate and spectrum in yeast. Proc. Natl. Acad. Sci. U. S. A. 111: E2310–8.
- 634
